# Supplementary material for: Rhomboids of Mycobacteria: Characterization Using an aarA Mutant of Providencia stuartii and Gene Deletion in Mycobacterium smegmatis
Source: PubMed Central journal article supplement (PMC3448690; doi:10.1371/journal.pone.0045741), 2012-09-21
Supplement: pone.0045741.s005.pdf [file pone.0045741.s005.pdf]

**Table S2: Vectors and bacterial strains used in this study**

| Plasmid/strain           | Genotype/description                                                                                                                  | Source/reference |
|--------------------------|---------------------------------------------------------------------------------------------------------------------------------------|------------------|
| <b>Plasmids</b>          |                                                                                                                                       |                  |
| pBCSK+                   | Phagemid, cloning vector                                                                                                              | Stratagene       |
| pBCSKrho1A               | pBCSK+MSMEG_5036 (Rhomboid protease 1 from <i>M. smegmatis</i> Mc2155 SMR5)                                                           | This study       |
| pBCSKrho2B               | pBCSK+MSMEG_4904 (Rhomboid protease 2 from <i>M. smegmatis</i> Mc2155 SMR5)                                                           | This study       |
| pBCSKrho1C               | pBCSK+Rv0110 (Rhomboid protease 1 from <i>MTB</i> H <sub>37</sub> Rv <i>rpsL</i> +) )                                                 | This study       |
| pBCSKrho2D               | pBCSK+Rv1337 (Rhomboid protease 2 from <i>MTB</i> H37Rv <i>rpsL</i> +) )                                                              | This study       |
| pBCSKrho1E               | pBCSK+Rv0110 (Rhomboid protease 1 from <i>MTB</i> strain BN44)                                                                        | This study       |
| pBCSKrho2F               | pBCSK+Rv1337 (Rhomboid protease 2 from <i>MTB</i> strain BN44)                                                                        | This study       |
| pBCSKrho1G               | pBCSK+BCG_0143 (Rhomboid protease 1 from <i>M. bovis</i> BCG)                                                                         | This study       |
| pBCSKrho2H               | pBCSK+BCG_1399 (Rhomboid protease 2 from <i>M. bovis</i> BCG)                                                                         | This study       |
| pBCSKrho1I               | pBCSK+Mb0114 (Rhomboid protease 1 from <i>M. bovis</i> , cattle strain JN55)                                                          | This study       |
| pBCSKrho2J               | pBCSK+Mb1372 (Rhomboid protease 2 from <i>M. bovis</i> cattle strain JN55)                                                            | This study       |
| pBCSKrho2K               | pBCSK+MAV1554 (Rhomboid protease 2 from <i>M. avium</i> , clinical strain SU-36800)                                                   | This study       |
| pBCSKrho2L               | pBCSK+MAP2426c (hypothetical protein without rhomboid domains; similar to N-terminus of MAV_1554)                                     | This study       |
| pBCSKrho2M               | pBCSK+MAP2425c (hypothetical protein with rhomboid domains; similar to C-terminus of MAV_1554)                                        | This study       |
| pBCSKrho2N               | pBCSK+MAP2425c/MAP2426c (in-frame clone with MAP2426c and MAP2425c)                                                                   | This study       |
| pMN252                   | Suicide vector for <i>rpsL</i> + cells; ColE1 origin, <i>FRT-hyg-FRT</i> , <i>rpsL</i> ; Amp <sup>R</sup> ; Hyg <sup>R</sup> ; 4642bp | [1]              |
| pMN49                    | Suicide delivery vector for deleting MSMEG_4904; pMN252 derivative; MSMEG_4904up and MSMEG_4904down; 6416bp                           | This study       |
| pMN50                    | Suicide delivery vector for deleting MSMEG_5036; pMN252 derivative; MSMEG_5036up and MSMEG_5036down; 6635bp                           | This study       |
| pML597                   | Unmarking vector for <i>rpsL</i> + cells; pMN210 derivative; <i>flp<sub>m</sub></i> ; 6627bp                                          | [2]              |
| pMV361                   | Mycobacterial integrating vector                                                                                                      | [3]              |
| pMV261                   | Mycobacterial replicating vector                                                                                                      | [3]              |
| <b>Bacterial strains</b> |                                                                                                                                       |                  |
| XL1 Blue MRF'            | <i>E. coli</i> , <i>recA1 endA1 gyrA96 thi-1 hsdR17 supE44</i>                                                                        | Stratagene       |

|                 |                                                                                                                                |            |
|-----------------|--------------------------------------------------------------------------------------------------------------------------------|------------|
|                 | <i>relA1 D(lac-pro) [F9 proAB lacIq lacZDM15 Tn10]</i>                                                                         |            |
| XD37            | <i>P. stuartii</i> , PR50 <i>cma37::mini-Tn5 lacZ1</i> ; wild type for <i>aarA</i>                                             | [4]        |
| XD37.A          | XD37 derivative, $\Delta$ <i>aarA</i>                                                                                          | [4]        |
| SMR5            | <i>M. smegmatis</i> , mc <sup>2</sup> 155 derivative; Sm <sup>R</sup>                                                          | JCRC       |
| DPK1            | SMR5 derivative; $\Delta$ MSMEG_5036- <i>hyg-FRT</i> ; Hyg <sup>R</sup> ; single rhomboid mutant (marked)                      | This study |
| DPK2            | SMR5 derivative; $\Delta$ MSMEG_5036- <i>FRT</i> , Hyg <sup>S</sup> ; single rhomboid mutant (unmarked)                        | This study |
| DPK3            | SMR5 derivative; $\Delta$ MSMEG_4904- <i>hyg-FRT</i> ; Hyg <sup>R</sup> , single rhomboid mutant (marked)                      | This study |
| DPK4            | SMR5 derivative; $\Delta$ MSMEG_4904- <i>FRT</i> , Hyg <sup>S</sup> , single rhomboid mutant (unmarked)                        | This study |
| DPK5            | SMR5 derivative; $\Delta$ MSMEG_4904- $\Delta$ MSMEG_5036- <i>hyg-FRT</i> ; Hyg <sup>R</sup> , double rhomboid mutant (marked) | This study |
| DPK6            | SMR5 derivative; $\Delta$ MSMEG_4904- $\Delta$ MSMEG_5036- <i>FRT</i> , Hyg <sup>S</sup> , double rhomboid mutant (unmarked)   | This study |
| H37Rv+rpsL      | <i>MTB H<sub>37</sub>Rv</i> , Sm <sup>R</sup> derivative                                                                       | [5]        |
| BN44            | <i>MTB Uganda</i> genotype strain                                                                                              | [6]        |
| BCG+rpsL        | <i>M. bovis</i> BCG, Sm <sup>R</sup>                                                                                           | [5]        |
| JN55            | <i>M. bovis</i> cattle isolate                                                                                                 | [7]        |
| <i>M. avium</i> | <i>M. avium</i> , strain SU-36800                                                                                              | JCRC       |
| MAP7            | MAP cattle isolate                                                                                                             | [8]        |

MAP, *Mycobacterium avium* subsp. *paratuberculosis*; SM<sup>R</sup>, streptomycin resistant; Hyg<sup>R</sup>, hygromycin resistant; Hyg<sup>S</sup>, Hygromycin susceptible; Amp<sup>R</sup>, ampicillin resistant

### Additional references

- Stephan J, Stemmer V, Niederweis M (2004) Consecutive gene deletions in *Mycobacterium smegmatis* using the yeast FLP recombinase. *Gene* 343: 181-190.
- Song H, Niederweis M (2007) Functional expression of the Flp recombinase in *Mycobacterium bovis* BCG. *Gene* 399: 112-119.
- Stover CK, de la Cruz VF, Fuerst TR, Burlein JE, Benson LA, et al. (1991) New use of BCG for recombinant vaccines. *Nature* 351: 456-460.
- Rather PN, Ding X, Baca-DeLancey RR, Siddiqui S (1999) *Providencia stuartii* genes activated by cell-to-cell signaling and identification of a gene required for production or activity of an extracellular factor. *J Bacteriol* 181: 7185-7191.
- Sander P, Springer B, Böttger EC (2001) Gene Replacement in *Mycobacterium tuberculosis* and *Mycobacterium bovis* BCG Using *rpsL* as a Dominant Negative Selectable Marker. In: Parish T, Stoker NG, editors. *Mycobacterium tuberculosis* Protocols: Humana Press. pp. 93-104.
- Asiimwe BB, Koivula T, Kallenius G, Huard RC, Ghebremichael S, Asiimwe J, Joloba ML (2008) *Mycobacterium tuberculosis Uganda* genotype is the predominant cause of TB in Kampala, Uganda. *The International Journal of Tuberculosis and Lung Disease* 12: 386-391.
- Asiimwe BB, Asiimwe J, Kallenius G, Ashaba FK, Ghebremichael S, et al. (2009) Molecular characterisation of *Mycobacterium bovis* isolates from cattle carcasses at a city slaughterhouse in Uganda. *Veterinary Record* 164: 655-658.

8. Okuni JB, Dovas C, Loukopoulos P, Bouzalas I, Kateete DP, et al. (2012) Isolation of *Mycobacterium avium* subspecies *paratuberculosis* from Ugandan cattle and strain differentiation using optimised DNA typing techniques. *BMC Veterinary Research* 8: 99.
