# Supplementary material for: Rhomboids of Mycobacteria: Characterization Using an aarA Mutant of Providencia stuartii and Gene Deletion in Mycobacterium smegmatis
Source: PubMed Central journal article supplement (PMC3448690; doi:10.1371/journal.pone.0045741), 2012-09-21
Supplement: pone.0045741.s006.pdf [file pone.0045741.s006.pdf]

Table S3: Primers used in this study

| Name                                                                  | Sequence (5' → 3')                           | Gene ID/<br>description | Size (bp) |
|-----------------------------------------------------------------------|----------------------------------------------|-------------------------|-----------|
| <b>PCR-primers used for directional cloning rhomboids into pBCSK+</b> |                                              |                         |           |
| 0110F                                                                 | GATTACTGCAGATATTCGGCTTCGCCGGAACC (PstI)      | Rv0110                  | 869       |
| 0110R                                                                 | GAGGATCTAGAACGCGAAGACAAGCGGCTATC (XbaI)      | BCG_0143                | 869       |
|                                                                       |                                              | Mb0114                  | 869       |
| 1337F                                                                 | GATTACCCGGGACGCCGGGTGGAAGTATCTG (SmaI)       | Rv1337                  | 869       |
| 1337R                                                                 | GATTAGCGGCCGCCGACGCCGGAATCAAAGACTC (NotI)    | BCG_1399                | 869       |
|                                                                       |                                              | Mb1372                  | 896       |
| 1554F                                                                 | GATTACCCGGGTGCACGGTGACACCGTGTTT (SmaI)       | MAV_1554                | 954       |
| 1554R                                                                 | GATTAGCGGCCGCTGCCGAGCTCATGTCTTGGG (NotI)     | MAP2c <sup>a</sup>      | 950       |
| 2425cF                                                                | CGGAATTCACGGCATCCGGCCGACGCGGGTCCG<br>(EcoRI) | MAP2425c                | 450       |
| 2425cR                                                                | GACTGCAGGGCGCCAGTGCCGAGCTCATGTC (PstI)       |                         |           |
| 2426cF                                                                | CGGAATTCGCCCGGCATCCCGAGCTACCGG (EcoRI)       | MAP2426c                | 269       |
| 2426cR                                                                | GACTGCAGTGGCCATCAGGTGCTGTCAGCTCTC (PstI)     |                         |           |
| 4904F                                                                 | GATTACCCGGGACGCCGGATGGAAGTATCTG (SmaI)       | MSMEG_4904              | 845       |
| 4904R                                                                 | GATTAGCGGCCGCACACCGGAATCGAAGATCCC (NotI)     |                         |           |
| 5036F                                                                 | GCGCAGAATTCACGGCCGGGTGAGACAAATC (EcoRI)      | MSMEG_5036              | 1000      |
| 5036R                                                                 | GCGGTACTAGTTGGACCCGGACAACATCCTG (SpeI)       |                         |           |
| <b>Site directed mutagenesis primers</b>                              |                                              |                         |           |
| 1337H87F                                                              | TTTGCGCCACTTTTGGCCGCGAACTGGCACCAC            | Rv1337 (H87A)           | 4200      |
| 1337H87R                                                              | GATGACGCCCCACAGGCCGTCTG                      |                         |           |
| 1337H92F                                                              | CACGCGAACTGGCAGCCCTAATGGCCAATACC             | Rv1337 (H92A)           | 4200      |
| 1337H92R                                                              | CAAAAGTGGCGCAAAGATGACGCCCCACAGG              |                         |           |
| 1337W90F                                                              | CTTTTGCACGCGAACGAGCACCACCTAATGG              | Rv1337 (W90E)           | 4200      |
| 1337W90R                                                              | TGGCGCAAAGATGACGCCCCAC                       |                         |           |
| 1554W90F                                                              | GCACGAGAGCTGGCAGCACCTGATG                    | MAV1554 (W90E)          |           |
| 1554W90R                                                              | AGCAGCGGCACGGTGTGGC                          |                         |           |
| 1337N96F                                                              | CACCACCTAATGGCCGCCACCATCCCGCTGCTG            | Rv1337 (N96A)           | 4200      |
| 1337N96R                                                              | CCAGTTCGCGTGCAAAGTGGCGCAAAG                  |                         |           |
| 1337G104F                                                             | CCGACCGACCATATCGAGGCCTCTGGCCTGATC            | Rv1337 (G104E)          | 4200      |
| 1337G104R                                                             | GCCACAGCTGCTGCCACATTGCCGATCAGCCAAG           |                         |           |
| 1337G147F                                                             | CATATCGGCGCCTCTGAGCTGATCTTTGGCTGGC           | Rv1337 (G147E)          | 4200      |
| 1337G147R                                                             | GTCGGTCGGGCCACAGCTGCTG                       |                         |           |
| 1337A148F                                                             | CGACCGACCATATCGGCCGATCTGGCCTGATCTTTGGC       | Rv1337 (A148R)          | 4200      |
| 1337A148R                                                             | GGCCACAGCTGCTGCCACATTGC                      |                         |           |
| 1337S149F                                                             | GACCATATCGGCGCCGCCGGCCTGATCTTTGGC            | Rv1337 (S149A)          | 4200      |
| 1337S149R                                                             | GGTCGGGCCACAGCTGCTGCCAC                      |                         |           |
| 1337G150F                                                             | TCTGGCCTGATCTTTGAGTGGCTGGCCTTCCTATTG         | Rv1337 (G150E)          | 4200      |
| 1337G150R                                                             | GGCGCCGATATGGTCGGTCCGGGCCACAG                |                         |           |
| 1337F153F                                                             | GCCTCTGGCCTGATCTCGGGCTGGCTGGCCTTC            | Rv1337 (F153S)          | 4200      |
| 1337F153R                                                             | GCCGATATGGTCGGTCCGGGCCACAGC                  |                         |           |
| 1337G154F                                                             | GTGGCGTGTTCATGGCAGGAGCATTAAAGTGGTGCGGTTG     | Rv1337 (G154E)          | 4200      |
| 1337G154R                                                             | CACACTGGCCAGCACCGGCATC                       |                         |           |
| 1337G203F                                                             | TCATTTAAGTGAGGCGGTTGCTG                      | Rv1337 (G203E)          | 4200      |

|                                                                                                 |                                                    |                              |      |
|-------------------------------------------------------------------------------------------------|----------------------------------------------------|------------------------------|------|
| 1337G203R                                                                                       | CCCTGCCATGACACGCCACCACACTG                         |                              |      |
| 1337H204F                                                                                       | GGCGTGTGCATGGCAGGGTGCCTTAAGTGGTGC GGTTGC           | Rv1337 (H204A)               | 4200 |
| 1337H204R                                                                                       | ACCACACTGGCCCAGCACCGGCATC                          |                              |      |
| 1337G207F                                                                                       | TCATTTAAGT <u>GAGGCG</u> TTGCTG                    | Rv1337 (G207E)               | 4200 |
| 1337G207R                                                                                       | AGATACGCCGCCACGACGC                                |                              |      |
| 1337G211F                                                                                       | AGTGGTGC GGTTGCTGAGGTCGTGGCGGCATC                  | Rv1337 (G211E)               | 4200 |
| 1337G211R                                                                                       | CTTTTGCACGCGAACGAGCACCACTAATGG                     |                              |      |
| <b>PCR-primers used in constructing suicide delivery vector pMN252</b>                          |                                                    |                              |      |
| 4904UP1                                                                                         | AGCTTT <u>GTTTAAAC</u> GCTGCGGATGATCGAACAGG (PmeI) | MSMEG_4904 upstream          | 852  |
| 4904UP2                                                                                         | GGACTAGTCCGGGTCATGCCGGTTCACGACCAC (SpeI)           |                              |      |
| 4904DN1                                                                                         | CCTTAATTAAGGCTGACCTCATGAGCGATCGAC (PacI)           | MSMEG_4904 downstream        | 922  |
| 4904DN2                                                                                         | CCATTTAAATGGCAGGATGGTCAAACGCACAC (SwaI)            |                              |      |
| 5036UP1                                                                                         | AGCTTT <u>GTTTAAAC</u> GTGAGCACACGCCGCTGATC (PmeI) | MSMEG_5036 upstream          | 1009 |
| 5036UP2                                                                                         | GGACTAGTCCCGGCGGCCGTGCGCATGCACTCCG (SpeI)          |                              |      |
| 5036DN1                                                                                         | CCTTAATTAAGGTAGATCGCCGCGCCCGGATTCAGG (PacI)        | MSMEG_5036 downstream        | 984  |
| 5036DN2                                                                                         | CCATTTAAATGGCCC GCCGATCCGTCTGCTTCG (SwaI)          |                              |      |
| 4904int1                                                                                        | GTTGCACGCCAACTGGGAAC                               | MSMEG_4904 internal fragment | 279  |
| 4904int2                                                                                        | ACACCAGCAGCACGAGGATG                               |                              |      |
| 5036int1                                                                                        | CGTCGATGTTCTGCACTAC                                | MSMEG_5036 internal fragment | 372  |
| 5036int2                                                                                        | TGATCGCGGTTCCCAAAG                                 |                              |      |
| <b>PCR-primers used in constructing integrating and replicating vectors (pMV361 and pMV261)</b> |                                                    |                              |      |
| pMV4904F                                                                                        | GATTACTAGTACGCCGGATGGAAGTATCTG (SpeI)              | MSMEG_4904                   | 845  |
| pMV4904R                                                                                        | GATTACGCGTACACCGGAATCGAAGATCCC (MluI)              |                              |      |
| pMV5036F                                                                                        | GCGCACTAGTACGGCCGGGTGAGACAAATC (SpeI)              | MSMEG_5036                   | 1000 |
| pMV5036R                                                                                        | GCGGACGCGTTGGACCCGACAACATCCTG (MluI)               |                              |      |
| pMV0110F                                                                                        | GATTACTAGTATATTCGGCTTCGCCGGAACC (SpeI)             | Rv0110                       | 967  |
| pMV0110R                                                                                        | GCGGACGCGTACGCGAAGACAAGCGGCTATC (MluI)             |                              |      |
| pMV1337F                                                                                        | GATTACTAGTACGCCGGGTGGAAGTATCTG (SpeI)              | Rv1337                       | 869  |
| pMV1337R                                                                                        | GCGGACGCGTCCGACGCCGGAATCAAAGACTC (MluI)            |                              |      |
| pMV1554F                                                                                        | GATTACTAGTTCGACGGTGACACCGTGTTTC (SpeI)             | MAV_1554                     | 954  |
| pMV1554R                                                                                        | GCGGACGCGTTGCCGAGCTCATGTCTTGGG (MluI)              |                              |      |
| pMAPF                                                                                           | GATTACTAGTTCGACGGTGACACCGTGTTTC (SpeI)             | MAP2425c/MAP24 26c           | 954  |
| pMAPR                                                                                           | GCGGACGCGTTGCCGAGCTCATGTCTTGGG (MluI)              |                              |      |

Restriction sites to facilitate directional cloning into vectors are underlined (and described in parenthesis beside each primer). 1 or F refers to the forward primer while 2 or R refers to reverse primer. For site directed mutagenesis, codons of the inactivated/substituted residues are underlined. Unless stated otherwise, primers were synthesized by IDT, Leuven, Belgium.
