# Supplementary material for: Rhomboids of Mycobacteria: Characterization Using an aarA Mutant of Providencia stuartii and Gene Deletion in Mycobacterium smegmatis
Source: PubMed Central journal article supplement (PMC3448690; doi:10.1371/journal.pone.0045741), 2012-09-21
Supplement: pone.0045741.s007.pdf [file pone.0045741.s007.pdf]

**Table S4: Rv1337 mutants generated through site directed mutagenesis**

| <b>Wild type position<sup>a</sup></b> | <b>Wild type residue</b> | <b>Wild type codon</b> | <b>Mutant codon</b> | <b>Mutant residue</b> | <b>Mutant</b> |
|---------------------------------------|--------------------------|------------------------|---------------------|-----------------------|---------------|
| L86                                   | Leucine                  | CTG                    | AAT                 | Asparagine            | Rv1337.L86N   |
| H87                                   | Histidine                | CAC                    | GCC                 | Alanine               | Rv1337.H87A   |
| H92                                   | Histidine                | CAC                    | GCC                 | Alanine               | Rv1337.H92A   |
| W90                                   | Tryptophan               | TGG                    | GAG                 | Glutamate             | Rv1337.W90E   |
| W90 <sup>b</sup>                      | Tryptophan               | TGG                    | GAG                 | Glutamate             | MAV1554.W90E  |
| N96                                   | Asparagine               | AAT                    | GCC                 | Alanine               | Rv1337.N96A   |
| G104                                  | Glycine                  | GGG                    | GAG                 | Glutamate             | Rv1337.G104E  |
| G147                                  | Glycine                  | GGC                    | GAG                 | Glutamate             | Rv1337.G147E  |
| A148                                  | Alanine                  | GCC                    | CGA                 | Arginine              | Rv1337.A148R  |
| S149                                  | Serine                   | TCT                    | GCC                 | Alanine               | Rv1337.S149A  |
| G150                                  | Glycine                  | GGC                    | GAG                 | Glutamate             | Rv1337.G150E  |
| F153                                  | Phenylalanine            | TTT                    | TCG                 | Serine                | Rv1337.F150S  |
| G154                                  | Glycine                  | GGC                    | GAG                 | Glutamate             | Rv1337.G154E  |
| G203                                  | Glycine                  | GGT                    | GAG                 | Glutamate             | Rv1337.G203E  |
| H204                                  | Histidine                | CAT                    | GCC                 | Alanine               | Rv1337.H204A  |
| G207                                  | Glycine                  | GGT                    | GAG                 | Glutamate             | Rv1337.G207E  |
| G211                                  | Glycine                  | GGC                    | GAG                 | Glutamate             | Rv1337.G211E  |

<sup>a</sup>The position is fronted with the amino acid type (single letter code); <sup>b</sup>template was gene encoding MAV\_1554
