# Supplementary material for: Rhomboids of Mycobacteria: Characterization Using an aarA Mutant of Providencia stuartii and Gene Deletion in Mycobacterium smegmatis
Source: PLoS One. 2012 Sep 21;7(9):e45741. doi: 10.1371/journal.pone.0045741 (PMC3448690; doi:10.1371/journal.pone.0045741)
Supplement: Table S1 — Catalogue of rhomboid family proteins from completed genomes of mycobacteria. Homologs are categorized as “rhomboid protease 1” or “rhomboid protease 2”. Sequences were retrieved from GenBank (PSI-BLAST algorithm) using ‘Rv0110’ and ‘Rv1337’ as queries or by blasting the mycobacterial genomes with the same queries. aWhere applicable; bRhomboid protease 2 in M. ulcerans is missing (pseudogene); c M. avium subsp. paratuberculosis. (XLS) [file pone.0045741.s004.xls]

## Sheet: Rhomboids of Mycobacteria_PLoS 
	Table S1: Catalogue of mycobacterial rhomboids classified as “Rhomboid protease 1 or Rhomboid protease 2”
			Rhomboid protease 1				Rhomboid protease 2
	Species	Straina	Locus taga	Protein ID	Length	Annotation	Locus taga	Protein ID	Length	Annotation
1	M. tuberculosis	H37Rv	Rv0110	NP_214624.1	249	Hypothetical protein	Rv1337	NP_215853	240	Hypothetical protein
2	M. tuberculosis	H37Ra	MRA_0116	YP_001281396.1	249	Rhomboid family protein	MRA_1345	YP_001282649.1	240	Integral membrane protein
4	M. tuberculosis	CTRI-2	MTCTRI2_0113	YP_005915180.1	249	Integral membrane protein	MTCTRI2_1374	YP_005916420.1	240	Integral membrane protein
5	M. tuberculosis	KZN 605	TBXG_000111	YP_006471565.1	284	Hypothetical protein	TBXG_002621	YP_006474111.1	240	Membrane protein
6	M. tuberculosis	KZN 4702	TBSG_00111	YP_005098579.1	284	Hypothetical protein	TBSG_02655	YP_005101123.1	240	Membrane protein
7	M. tuberculosis	KZN 1435	TBMG_00111	YP_003030029.1	284	Hypothetical protein	TBMG_02641	YP_003032616.1	240	Hypothetical protein
8	M. tuberculosis	BN44		ADO17910.1	284	Rhomboid protease 1		ADO17911.1	240	Rhomboid protease 2
9	M. tuberculosis	F11	TBFG_10111	YP_001286056.1	284	Integral membrane protein	TBFG_11367	YP_001287312.1	240	Hypothetical protein
10	M. tuberculosis	UT205	UDA_0110	YP_005306459.1	249	Hypothetical protein	UDA_1337	YP_005307657.1	240	Hypothetical protein
11	M. tuberculosis	CDC1551	MT0119	NP_334528.1	284	Rhomboid family protein	MT1378	NP_335829.1	227	Rhomboid family protein
12	M. tuberculosis	CCDC5079 (Beijing)	CCDC5079_0096	YP_005907928.1	212	Integral membrane protein	CCDC5079_1238	YP_005912661.1	204	Integral membrane protein
13	M. tuberculosis	CCDC5180 (Beijing)	CCDC5180_0096	YP_005911519.1	212	Integral membrane protein	CCDC5180_1229	YP_005909061.1	204	Integral membrane protein
14	M. tuberculosis	RGTB423	MRGA423_00715	YP_005921471.1	249	Hypothetical protein	MRGA423_08380	YP_005922603.1	181	Hypothetical protein
15	M. tuberculosis	RGTB327		Missing (pseudogene)			MRGA327_08380	YP_005360018.1	241	Hypothetical protein
16	M. bovis BCG	Pasteur 1173P2	BCG_0143	YP_976246.1	249	Integral membrane protein	BCG_1399	YP_977491.1	240	Putative integral membrane protein
17	M. bovis BCG	Mexico	BCGMEX_0114	YP_005169589.1	249	Hypothetical protein	BCGMEX_1371	YP_005170835.1	240	Putative integral membrane protein
18	M. bovis BCG	Tokyo 172	JTY_0114	YP_002643183.1	249	Integral membrane protein	JTY_1373	YP_002644429.1	240	Integral membrane protein
19	M. bovis	AF2122/97	Mb0114	NP_853781.1	249	Hypothetical protein	Mb1372	NP_855026.1	240	Hypothetical protein
20	M. bovis	JN55		ADO17914.1	284	Rhomboid protease 1		ADO17915.1	240	Rhomboid protease 2
21	M. africanum		MAF_01110	YP_004721836.1	249	Hypothetical protein	MAF_13610	YP_004723048.1	240	Hypothetical protein
22	M. canettii		MCAN_01131	YP_004743597.1	249	Putative integral membrane protein	MCAN_13551	YP_004744805.1	240	Putative integral membrane protein
22	M. marinum	M	MMAR_0300	YP_001848622.1	289	Serine protease	MMAR_4059	YP_001852321.1	222	Integral membrane protein
23	M. ulcerans	Agy99	MUL_4822	YP_908200.1	254	Serine protease	MUL_3926	4553595 (Gene ID)		Pseudogene
24	M. leprae	TN		Missing			ML1171	NP_301853.1	238	Hypothetical protein
25	M. leprae	Br4923		Missing			MLBr_01171	YP_002503483.1	238	Hypothetical protein
26	M. avium	104		Missing			MAV_1554	YP_880789.1	223	Rhomboid family protein
27	M. avium	SU36800		Missing				ADO17916.1	223	Rhomboid protease 2
28	MAP	K-10		Missing			MAP2425c	NP_961359.1	147	Hypothetical protein
29	MAP	K-10		Missing			MAP2426c	NP_961360.1	72	Hypothetical protein
30	MAP	MAP27		Missing				ADO17917.1	147	Rhomboid protease 2
29	MAP	MAP27		Missing				ADO17918.1	72	Rhomboid protease 2
30	MAP	S397		Missing			MAPs_3538	EGO39840.1	223	Uncharacterized membrane protein
31	M. intracellulare	ATCC 13950		Missing			MintA_010100004534	ZP_05224168.1	204	Rhomboid family protein
32	M. intracellulare	MOTT-02		Missing			OCO_16180	YP_005342302.1	223	Rhomboid family protein
33	M. intracellulare	MOTT-64		Missing			OCQ_13860	YP_005347219.1	203	Rhomboid family protein
34	M. colombiense			Missing				ZP_08714662.1	203	Rhomboid family protein
35	M. sp. MOTT36Y			Missing			W7S_06780	YP_006305066.1	204	Rhomboid family protein
36	M. xenopi			Missing			MXEN_10301	ZP_09980385.1	219	Integral membrane protein
37	M. kansasii			ZP_04746743.1	288	Integral membrane protein		ZP_04748139.1	222	Integral membrane protein
38	M. parascrofulaceum			ZP_06849666.1	285	Rhomboid family protein		ZP_06851867.1	226	Rhomboid family protein
39	M. sp. JLS		Mjls_5529	YP_001073783.1	289	Rhomboid family protein	Mjls_3833	YP_001072100.1	229	Rhomboid family protein
40	M. sp. MCS		Mmcs_5148	YP_642308.1	289	Rhomboid-like protein	Mmcs_3847	YP_641008.1	229	Rhomboid-like family protein
41	M. sp. KMS		Mkms_5237	YP_941216.1	289	rhomboid family protein	Mkms_3921	YP_939903.1	229	Rhomboid family protein
42	M. rhodesiae	NBB3	MycrhN_1673	YP_004999502.1	282	Peptidase S54, rhomboid domain protein	MycrhN_3867	YP_005001593.1	220	Peptidase S54, rhomboid domain protein
43	M. rhodesiae	JS60	MycrhDRAFT_2369	EHB55175.1	248	Peptidase S54, rhomboid domain protein	MycrhDRAFT_6830	EHB44364.1	220	Peptidase S54, rhomboid domain protein
44	M. smegmatis	mc2155	MSMEG_5036	YP_889287.1	250	Rhomboid family protein	MSMEG_4904	YP_889159.1	219	Rhomboid family protein
45	M. smegmatis	mc2155 (SMR5)		ADO17919.1	250	Rhomboid protease 1		ADO17920.1	245	Rhomboid protease 2
46	M. phlei		MPHLEI_19664	ZP_09976832.1	248	Hypothetical protein		ZP_09976766.1	209	Rhomboid family protein
47	M. sp. JDM601			YP_004525445.1	264	Serine protease	JDM601_1340	YP_004522594.1	191	Hypothetical protein
48	M. tusciae			ZP_09681852.1	282	Rhomboid family protein		ZP_09684123.1	231	Rhomboid family protein
49	M. gilvum	PYR-GCK	Mflv_1071	YP_001132341	279	Hypothetical protein	Mflv_2355	YP_001133621.1	225	Rhomboid family protein
50	M. gilvum	Spyr1	Mspyr1_51170	YP_004079478.1	279	Hypothetical protein	Mspyr1_17880	YP_004076285.1	225	Hypothetical protein
51	M. thermoresistibile			ZP_09081357.1	281	Rhomboid family protein	KEK_13008	ZP_09083165.1	226	Hypothetical protein
52	M. vanbaalenii	PYR-1	Mvan_5753	YP_956524.1	290	Rhomboid family protein	Mvan_4290	YP_955073.1	225	Rhomboid family protein
53	M. chebuense		Mycch_5096	YP_006455461.1	285	Hypothetical protein	Mycch_3735	YP_006454145.1	231	Hypothetical protein
54	M. massiliense			ZP_09412407.1	252	Rhomboid family protein	MMAS_14080	ZP_09409007.1	193	Hypothetical protein
55	M. abscessus	ATCC 19977	MAB_0026	YP_001700782.1	287	Rhomboid family protein	MAB_1481	YP_001702221.1	225	Hypothetical protein
56	M. abscessus	47J26	MAB47J26_21895	EHB97118.1	232	Rhomboid family protein	MAB47J26_10757	EHB99210.1	227	Hypothetical protein
57	M. abscessus	M93	OUW_12884	EIC65587.1	247	Rhomboid family protein	OUW_19086	EIC63319.1	227	Hypothetical protein
58	M. abscessus subsp. bolletii			EHM14390.1	252	Rhomboid family protein	MBOL_14430	EHM22541.1	193	Hypothetical protein
